# Supplementary material for: Microwave-driven green synthesis of carbon quantum dots for fluorescent anti-counterfeiting films: mechanism and application
Source: Royal Society of Chemistry journal article supplement (doi:10.1039/d5nj01805f), 2025-01-01
Supplement: d5nj01805f1.pdf [file d5nj01805f1.pdf]

According to preparation process, this study carried out experimental preparation by fixing the amount of citric acid, changing the amount of urea and microwave reaction time, a total of five sets of experiments were carried out.

Table 1 Experimental programme

| Number | Citric acid(g) | Urea(g) | Water(mL) | Power(W) | Time(s) | Sample                                                                                |
|--------|----------------|---------|-----------|----------|---------|---------------------------------------------------------------------------------------|
| 1      | 0.4            | 0.4     | 30        | 700      | 350     |    |
| 2      | 0.4            | 0.6     | 30        | 700      | 280     |    |
| 3      | 0.4            | 0.8     | 30        | 700      | 280     |    |
| 4      | 0.4            | 1.0     | 30        | 700      | 290     |   |
| 5      | 0.4            | 1.2     | 30        | 700      | 280     |  |
